# Supplementary material for: Chloroplast Phylogenomic Inference of Green Algae Relationships
Source: PubMed Central journal article supplement (PMC4742797; doi:10.1038/srep20528), 2016-02-05
Supplement: srep20528-s1.pdf [file srep20528-s1.pdf]

## Chloroplast Phylogenomic Inference of Green Algae Relationships

Linhua Sun<sup>1</sup>, Ling Fang<sup>1</sup>, Zhenhua Zhang<sup>1</sup>, Xin Chang<sup>1</sup>, David Penny<sup>2</sup>, Bojian  
Zhong<sup>1,\*</sup>

<sup>1</sup>Jiangsu Key Laboratory for Biodiversity and Biotechnology, College of Life  
Sciences, Nanjing Normal University, Nanjing, China

<sup>2</sup> Institute of Fundamental Sciences, Massey University, Palmerston North, New  
Zealand

\*Corresponding author: Email: [bjzhong@gmail.com](mailto:bjzhong@gmail.com)

Table S1. The list of taxon names and z-scores.

| <b>Taxon name</b>                           | <b>Taxonomy</b>         | <b>z-score</b> |
|---------------------------------------------|-------------------------|----------------|
| <i>Acetabularia acetabulum</i>              | Ulvophyceae             | 8.62           |
| <i>Halimeda cylindracea</i>                 | Ulvophyceae             | 6.46           |
| <i>Oltmannsiellopsis viridis</i>            | Ulvophyceae             | 5.94           |
| <i>Trentepohlia annulata</i>                | Ulvophyceae             | 5.66           |
| <i>Bryopsis hypnoides</i>                   | Ulvophyceae             | 5.15           |
| <i>Codium decortcatum</i>                   | Ulvophyceae             | 4.85           |
| <i>Pseudendoclonium akinetum</i>            | Ulvophyceae             | 3.59           |
| <i>Cephaleuros parasiticus</i>              | Ulvophyceae             | 1.89           |
| <b><i>Hemichloris antarctica</i></b>        | <b>Trebouxiophyceae</b> | <b>17.36</b>   |
| <b><i>Coccomyxa sp.C-169</i></b>            | <b>Trebouxiophyceae</b> | <b>17.16</b>   |
| <b><i>Trebouxiophyceae sp.MX-AZ01</i></b>   | <b>Trebouxiophyceae</b> | <b>16.10</b>   |
| <i>Oocystis solitaria</i>                   | Trebouxiophyceae        | 8.69           |
| <i>Geminella minor</i>                      | Trebouxiophyceae        | 6.94           |
| <i>Gloeotilopsis sterilis</i>               | Trebouxiophyceae        | 6.36           |
| <i>Planctonema lauterbornii</i>             | Trebouxiophyceae        | 5.50           |
| <i>Parachlorella kessleri</i>               | Trebouxiophyceae        | 4.94           |
| <i>Dicloster acuatus</i>                    | Trebouxiophyceae        | 4.83           |
| <i>Leptosira terrestris</i>                 | Trebouxiophyceae        | 4.02           |
| <i>Marvania geminata</i>                    | Trebouxiophyceae        | 3.14           |
| <i>Trebouxia aggregata</i>                  | Trebouxiophyceae        | 3.13           |
| <i>Prasiolopsis sp.</i>                     | Trebouxiophyceae        | 2.01           |
| <i>Watanabea reniformis</i>                 | Trebouxiophyceae        | 1.40           |
| <i>Chlorella variabilis</i>                 | Trebouxiophyceae        | -0.60          |
| <i>Chlorella vulgaris</i>                   | Trebouxiophyceae        | -0.68          |
| <i>Scenedesmus obliquus</i>                 | Chlorophyceae           | 6.66           |
| <i>Oedogonium cardiacum</i>                 | Chlorophyceae           | 6.43           |
| <i>Stigeoclonium helveticum</i>             | Chlorophyceae           | 5.62           |
| <i>Schizomeris leibleinii</i>               | Chlorophyceae           | 5.29           |
| <i>Dunaliella salina</i>                    | Chlorophyceae           | 5.04           |
| <i>Chlamydomonas moewusii</i>               | Chlorophyceae           | 4.87           |
| <i>Chlamydomonas reinhardtii</i>            | Chlorophyceae           | 1.85           |
| <i>Volvox carteri</i>                       | Chlorophyceae           | 1.79           |
| <i>Floydiella terrestris</i>                | Chlorophyceae           | 0.68           |
| <i>Tetraselmis spp.</i>                     | Chlorodendrophyceae     | 1.15           |
| <b><i>Marsupiomonas sp. NIES 1824</i></b>   | <b>Pedinophyceae</b>    | <b>32.50</b>   |
| <i>Pedinomonas tuberculata</i>              | Pedinophyceae           | 2.64           |
| <i>Pedinomonas minor</i>                    | Pedinophyceae           | 1.98           |
| <i>Pedinophyceae sp.YPF-701</i>             | Pedinophyceae           | 1.78           |
| <b><i>Nephroselmis astigmatica</i></b>      | <b>Prasinophyceae</b>   | <b>34.68</b>   |
| <b><i>Prasinophyceae sp.MBIC 106222</i></b> | <b>Prasinophyceae</b>   | <b>25.32</b>   |
| <b><i>Micromonas sp.RCC 299</i></b>         | <b>Prasinophyceae</b>   | <b>24.92</b>   |
| <b><i>Ostreococcus tauri</i></b>            | <b>Prasinophyceae</b>   | <b>24.75</b>   |
| <b><i>Nephroselmis olivacea</i></b>         | <b>Prasinophyceae</b>   | <b>22.91</b>   |
| <b><i>Pycnococcus provasolii</i></b>        | <b>Prasinophyceae</b>   | <b>20.60</b>   |
| <i>Monomastix sp.OKE-1</i>                  | Prasinophyceae          | 5.56           |
| <i>Prasinophyceae sp.CCMP 1205</i>          | Prasinophyceae          | 5.36           |
| <i>Prasinoderma coloniale</i>               | Prasinophyceae          | 3.63           |
| <i>Prasinococcus capsulatus</i>             | Prasinophyceae          | 2.90           |
| <i>Pyramimonas parkeae</i>                  | Prasinophyceae          | 2.81           |
| <i>Pterosperma cristatum</i>                | Prasinophyceae          | 2.49           |
| <i>Picocystis salinarum</i>                 | Prasinophyceae          | -1.65          |
| <i>Mesostigma viride</i>                    | Streptophyta            | 6.21           |
| <i>Chlorokybus atmophyticus</i>             | Streptophyta            | 4.55           |

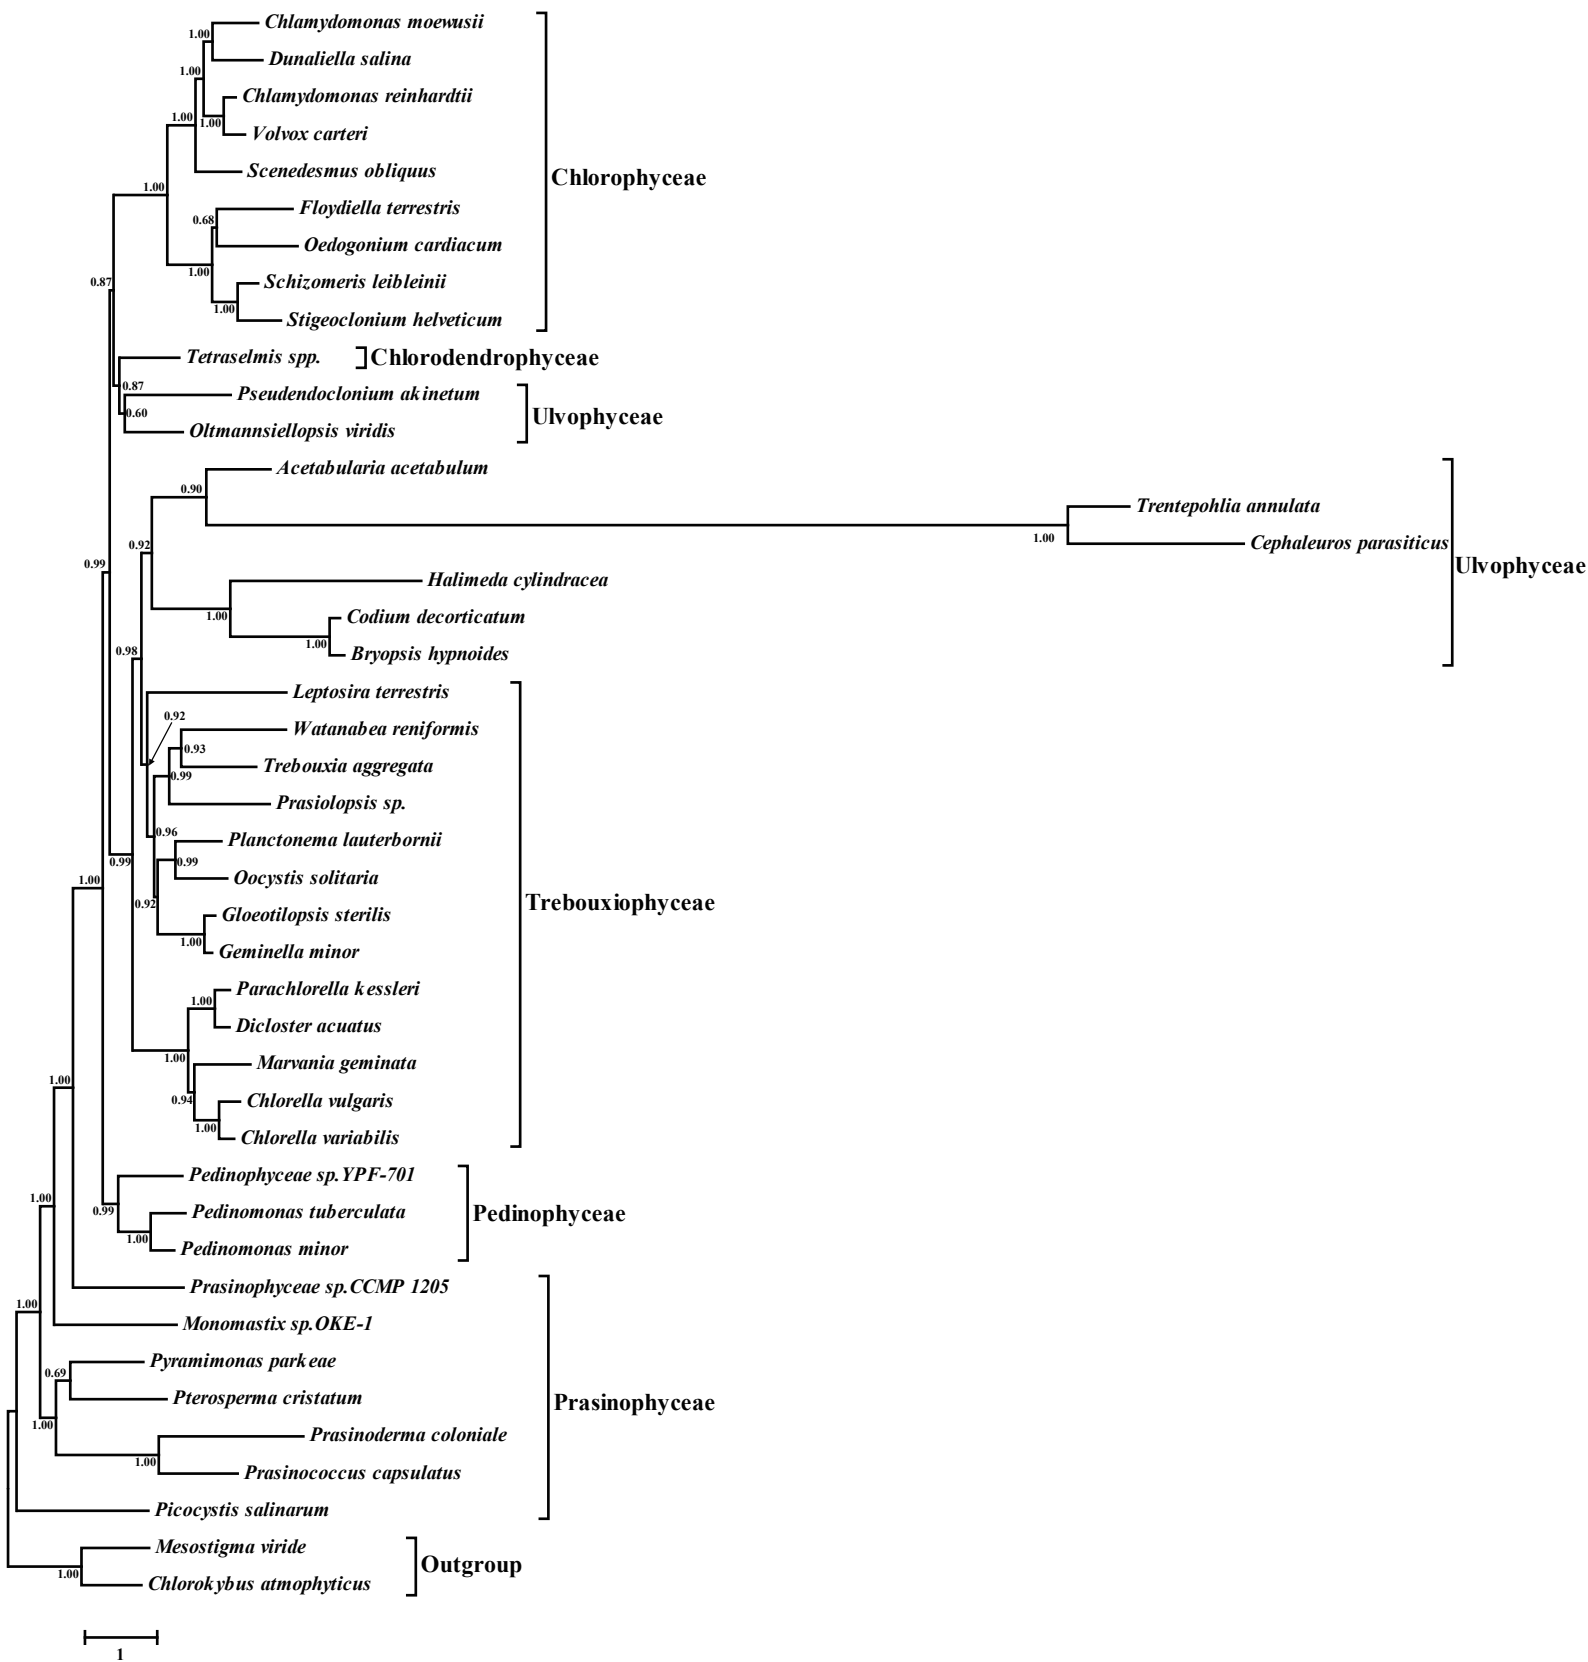

Figure S1. Bayesian phylogenetic tree under the CAT+GTR heterogeneous model based on 30,240 sites with 43 taxa. *Trentepohlia annulata* and *Cephaleuros parasiticus* exhibit extreme long branches. The posterior probability (PP) values are shown on the nodes.

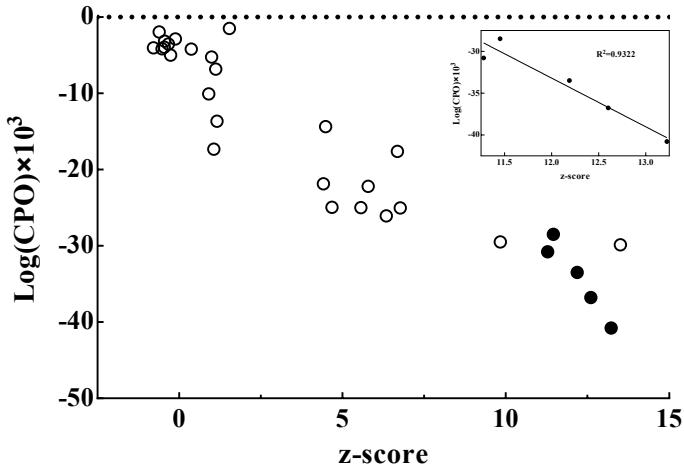

Figure S2. The correlation between the compositional heterogeneity and model fit for a series of subsets, each subset having 1,000 fast-evolving sites. The 5,000 fastest-evolving sites were marked with five solid circles.

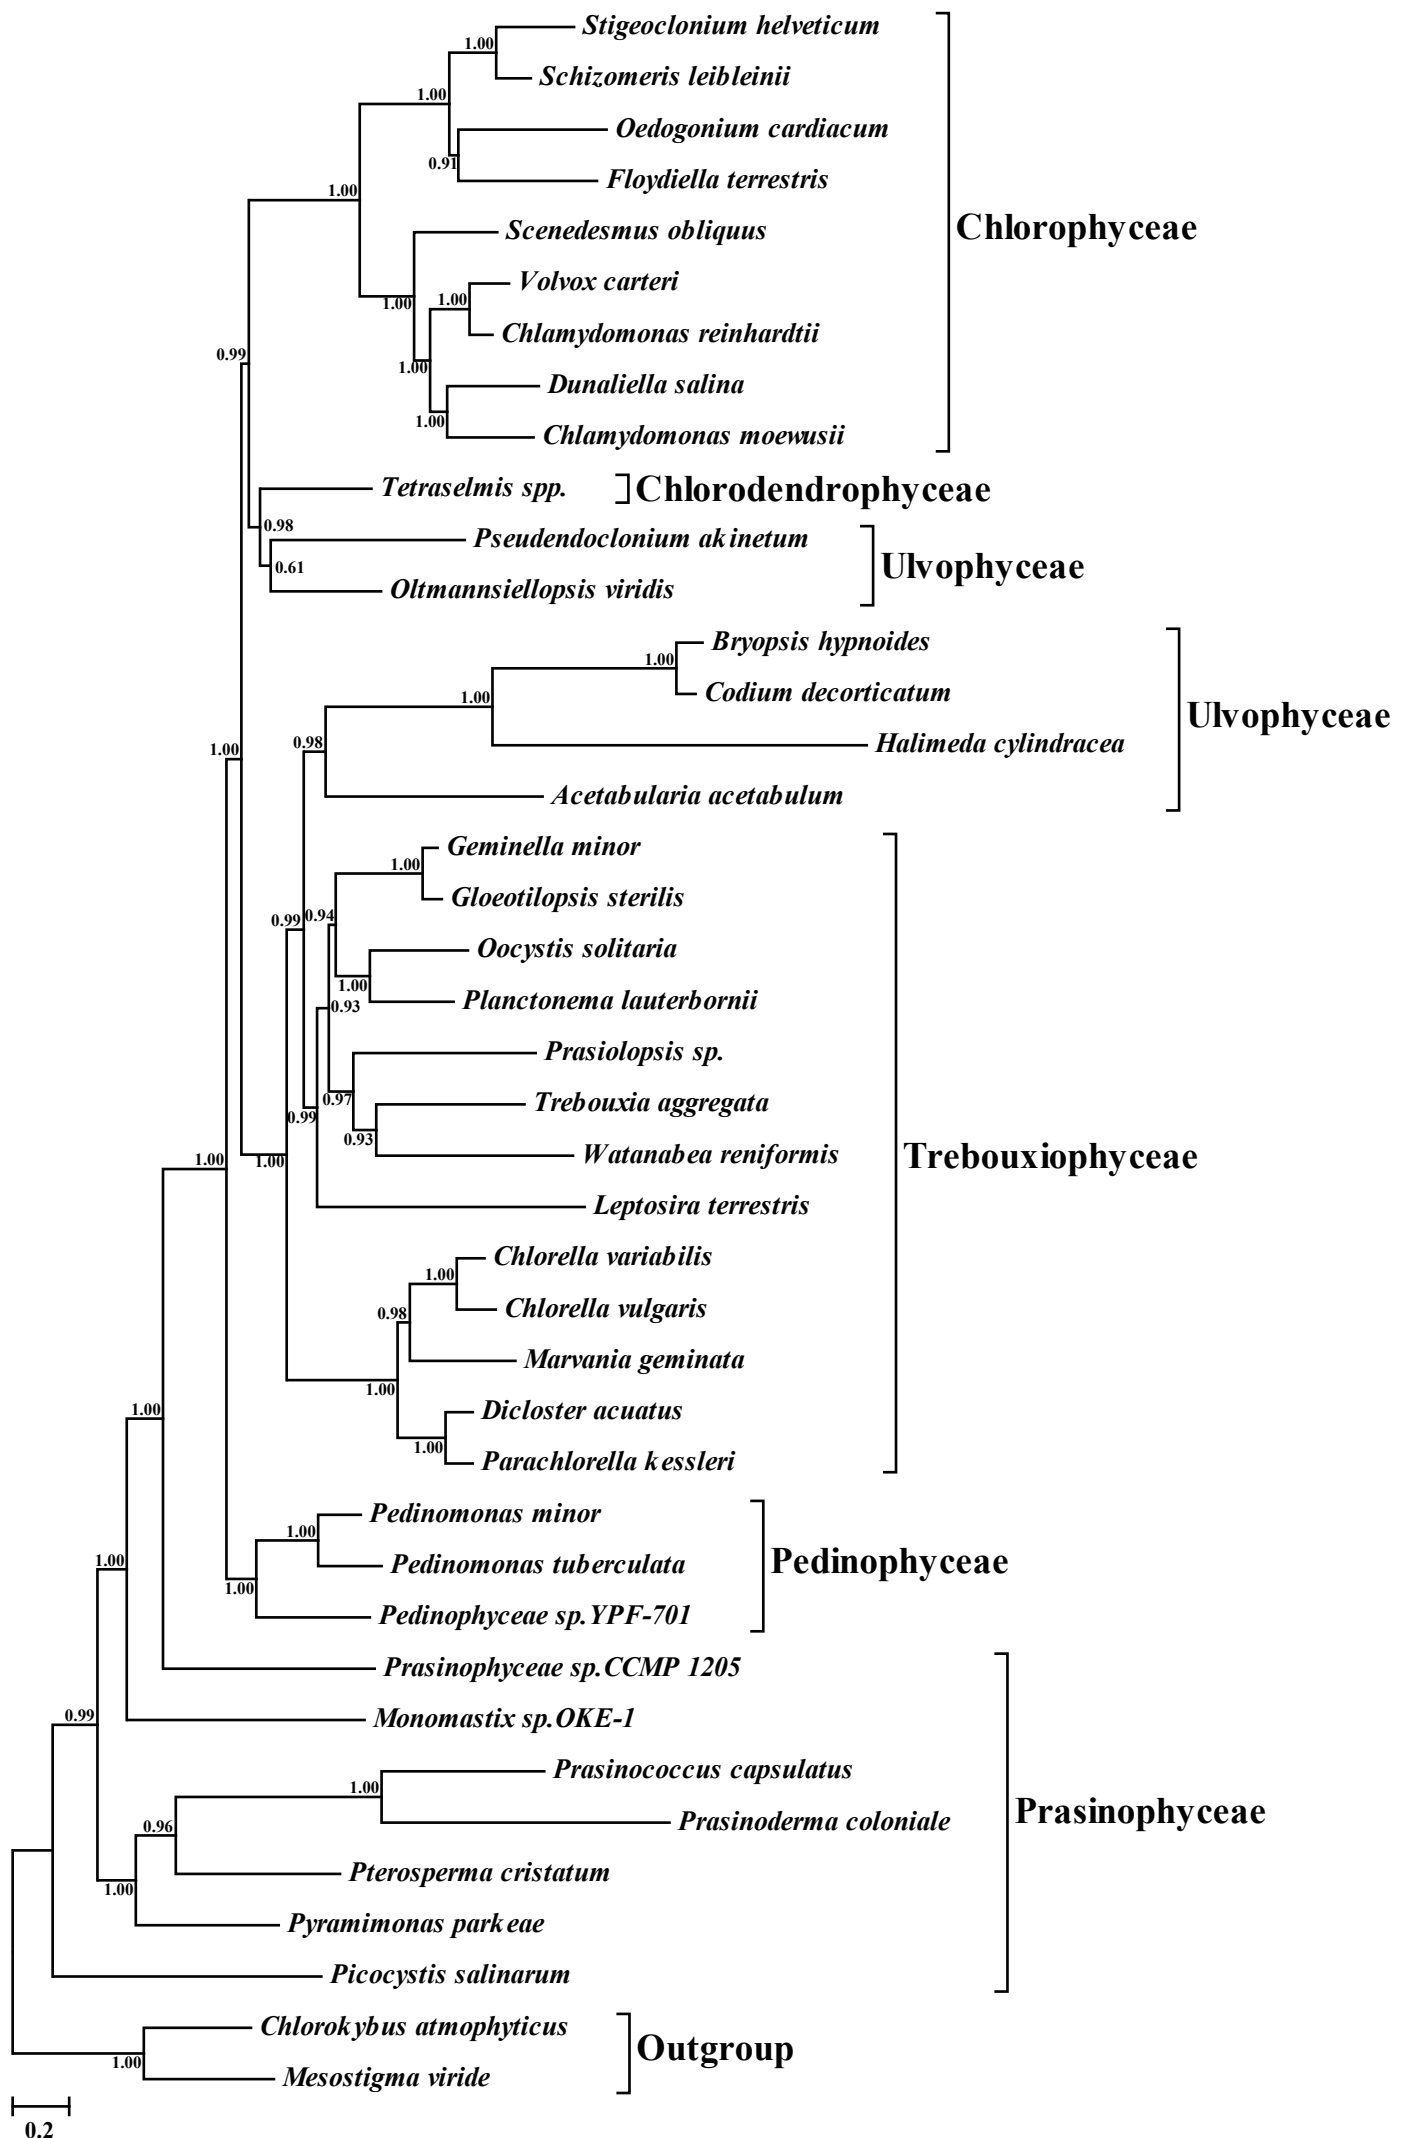

Figure S3. Bayesian phylogenetic tree under the CAT+GTR heterogeneous model based on 29,240 sites with 41 taxa. The posterior probability (PP) values are shown on the nodes.

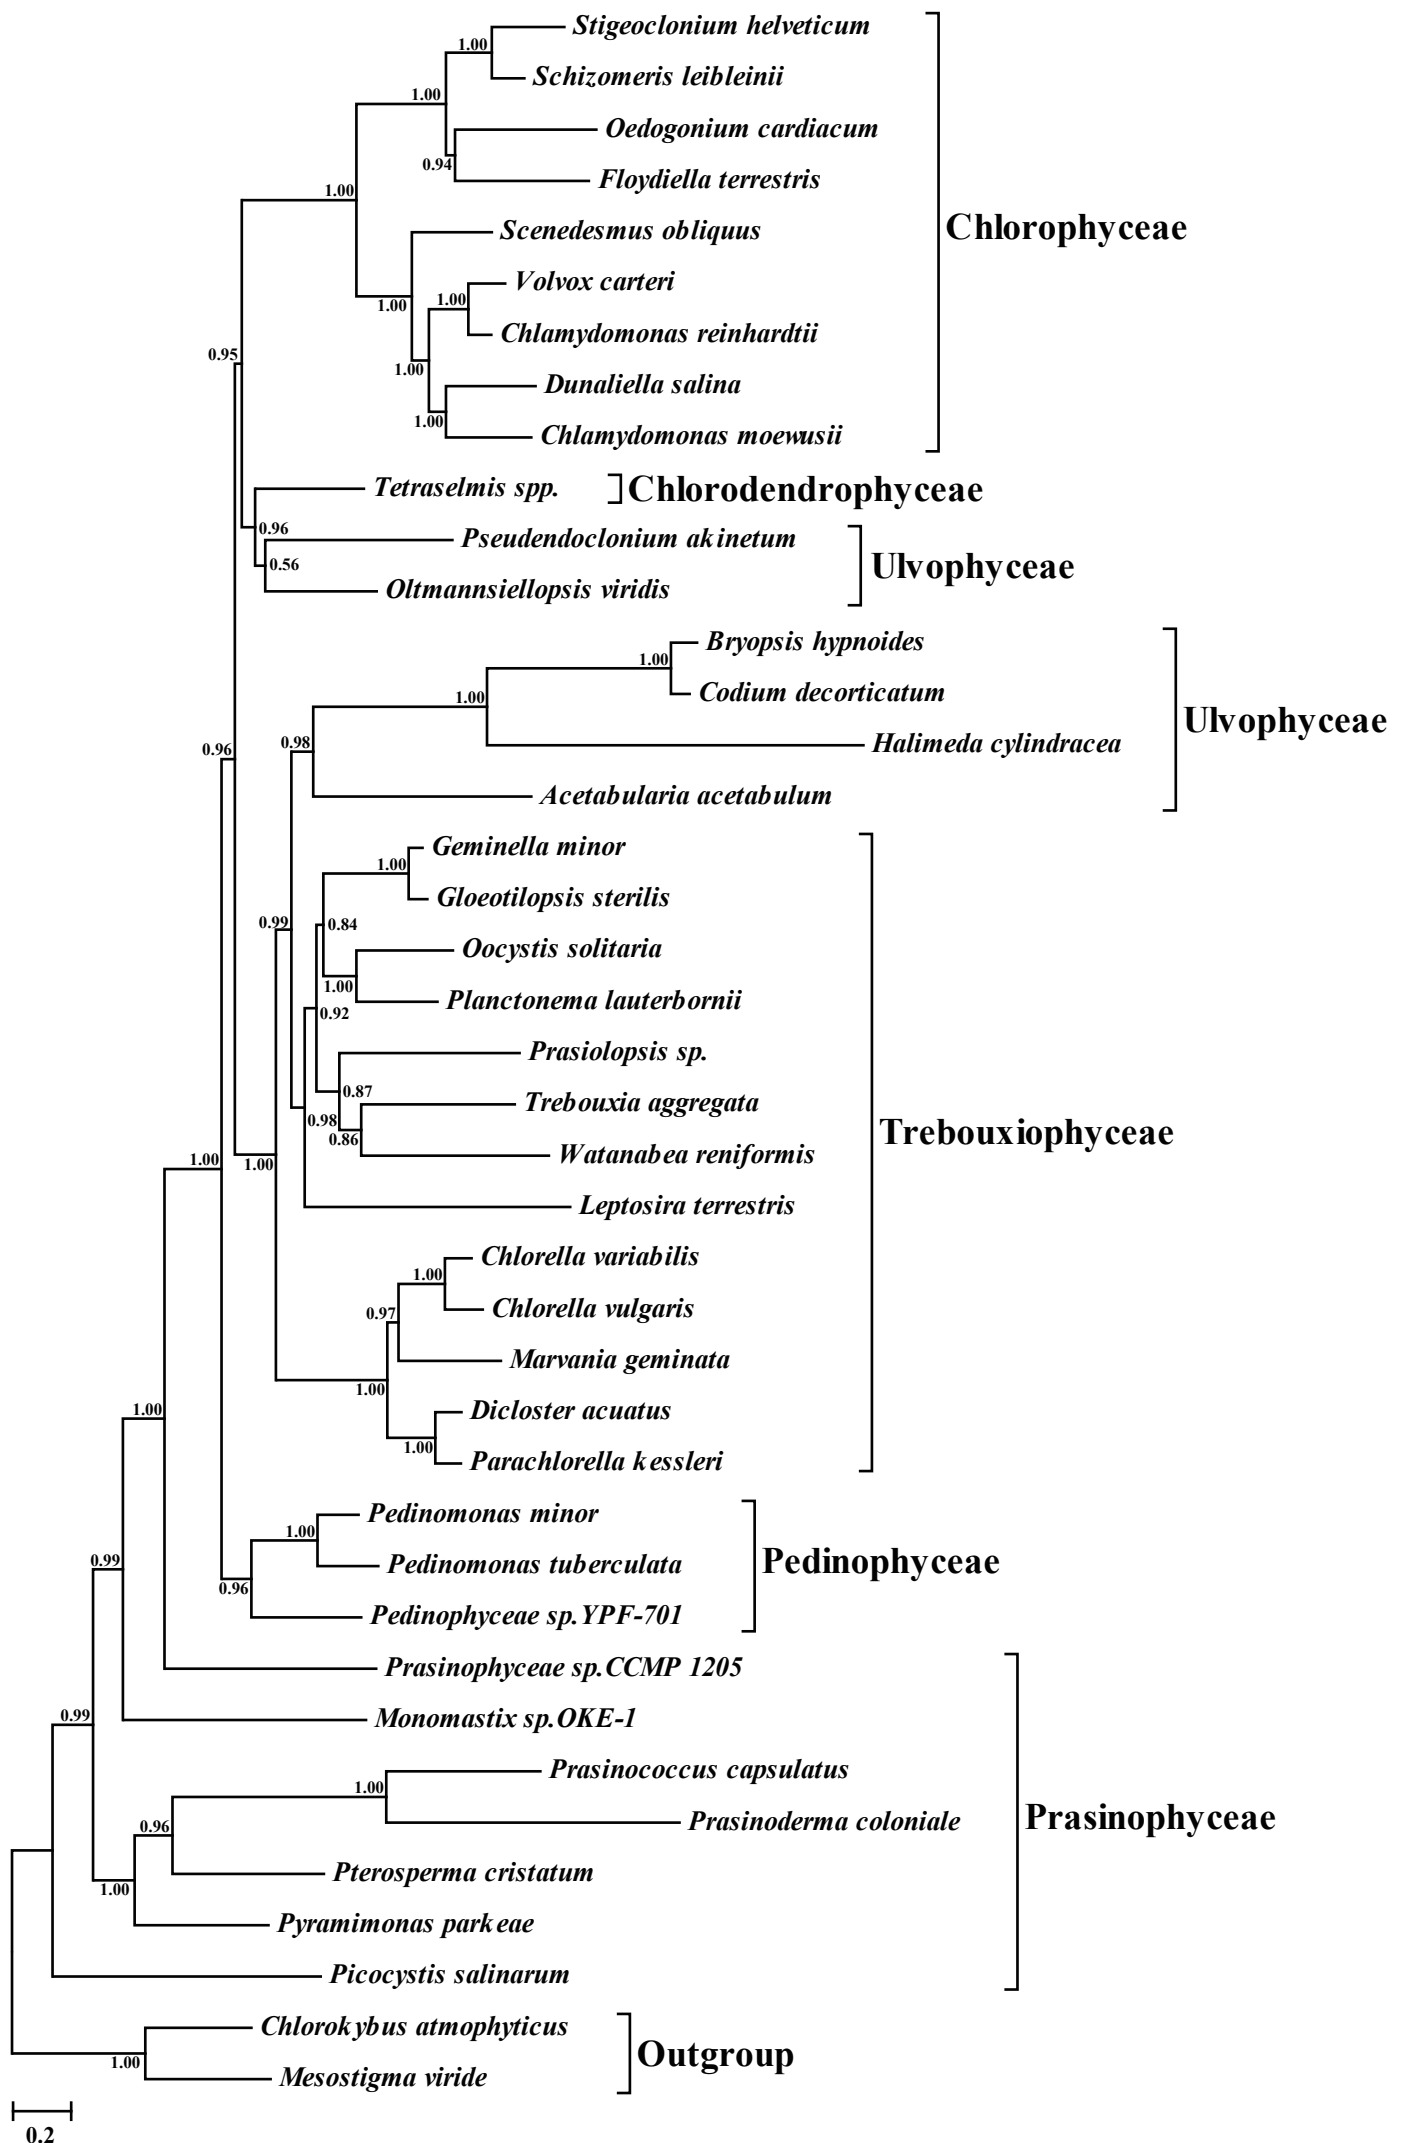

Figure S4. Bayesian phylogenetic tree under the CAT+GTR heterogeneous model based on 28,240 sites with 41 taxa. The posterior probability (PP) values are shown on the nodes.

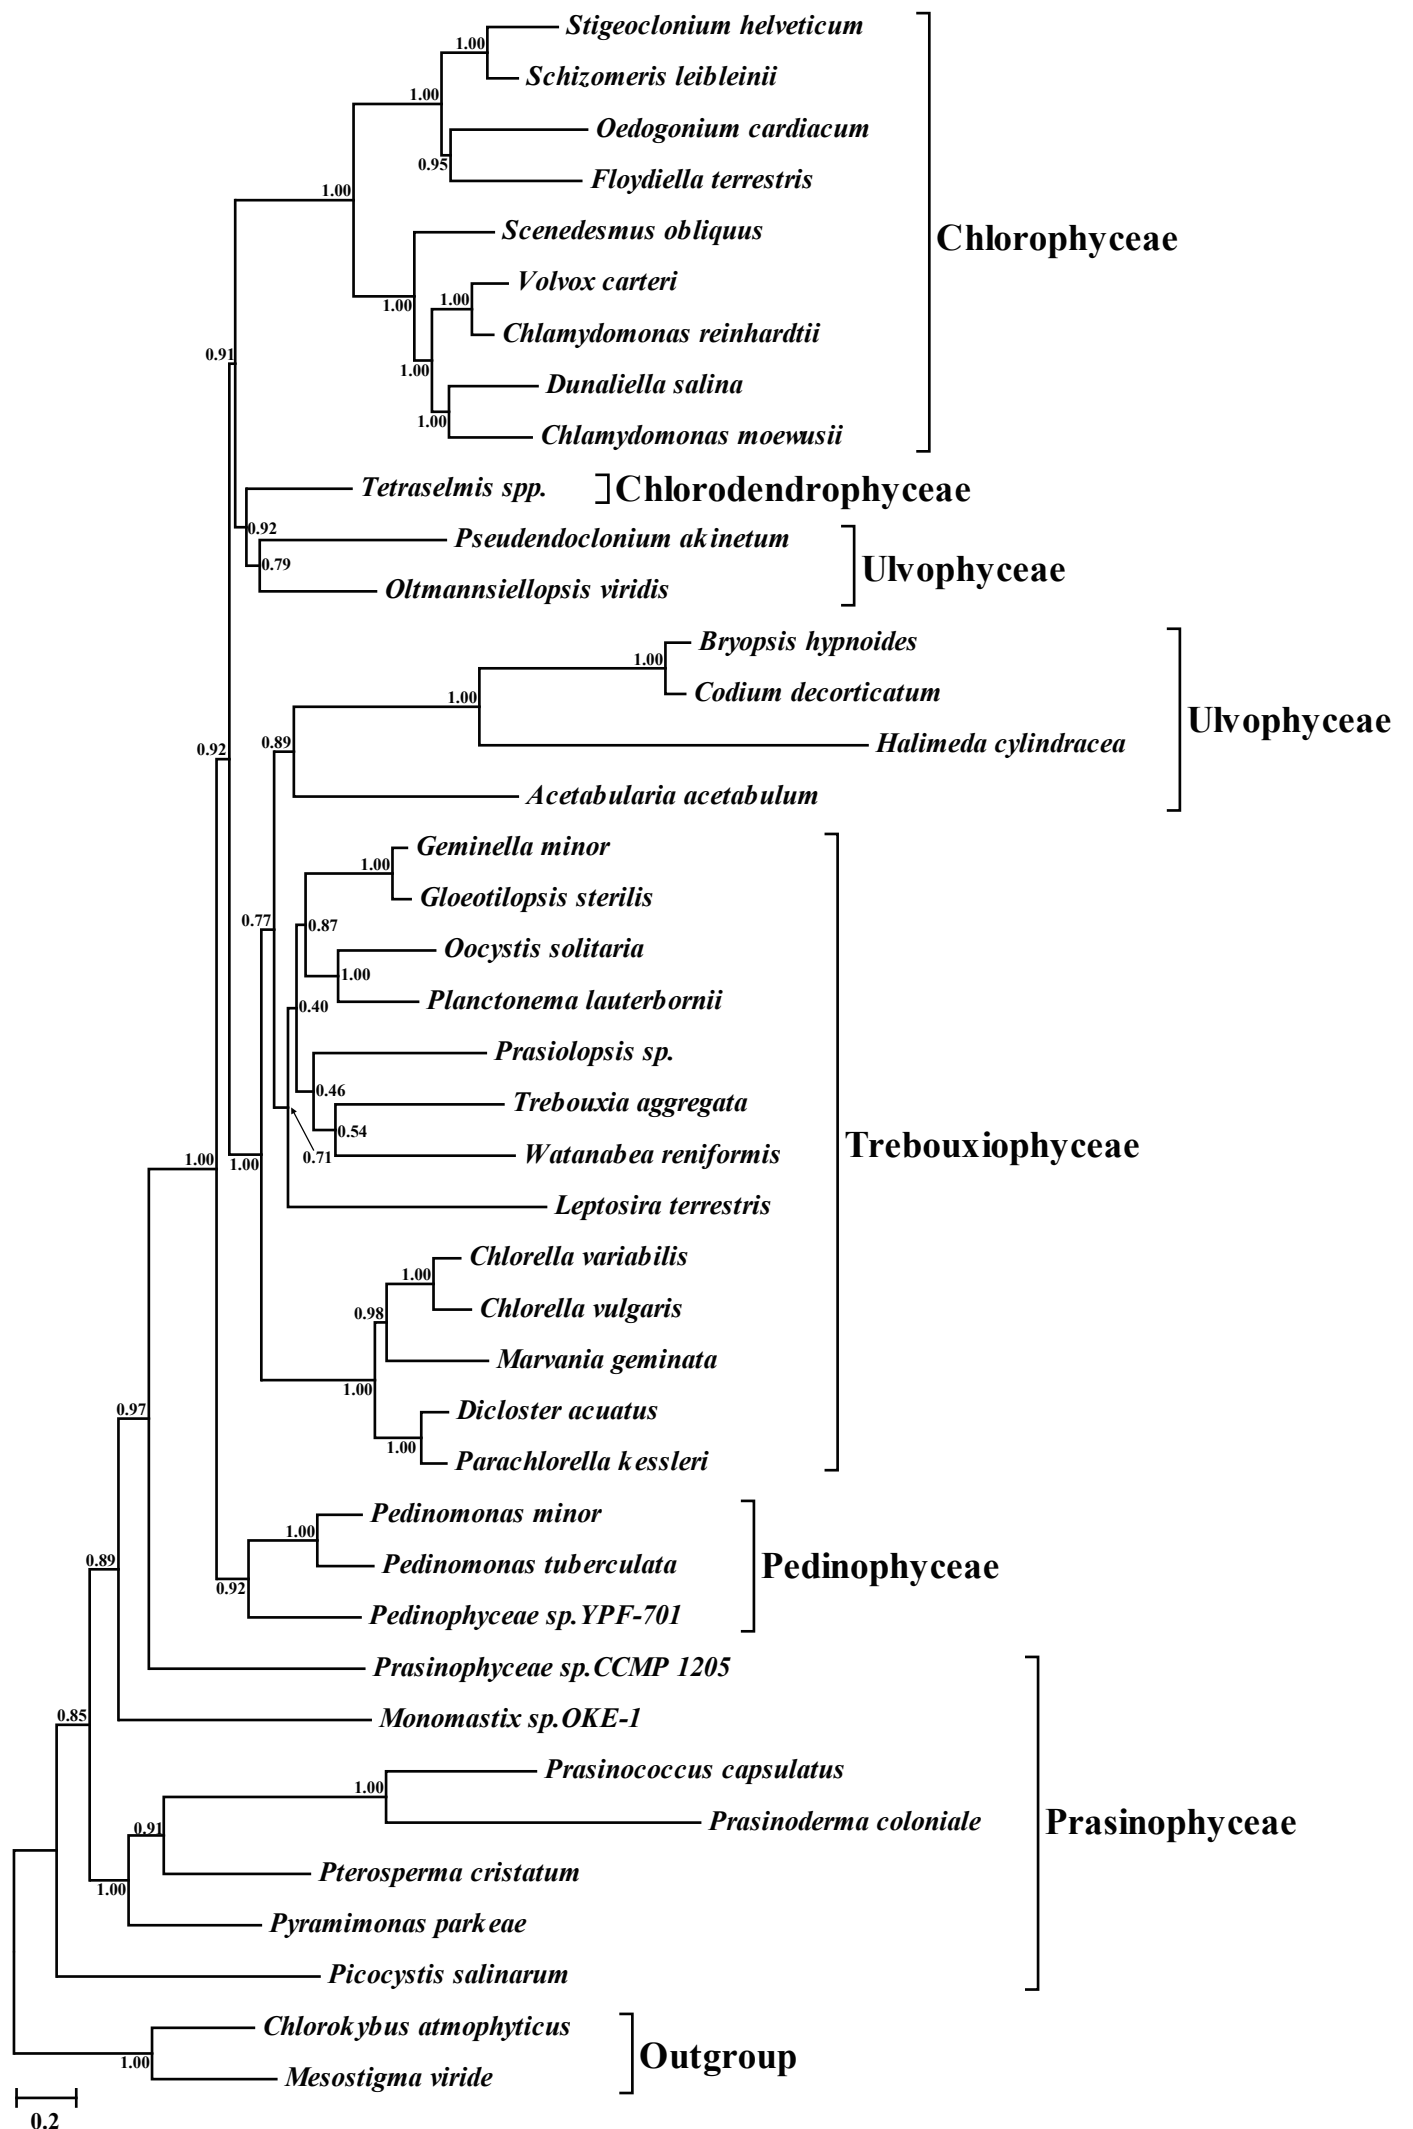

Figure S5. Bayesian phylogenetic tree under the CAT+GTR heterogeneous model based on 27,240 sites with 41 taxa. The posterior probability (PP) values are shown on the nodes.

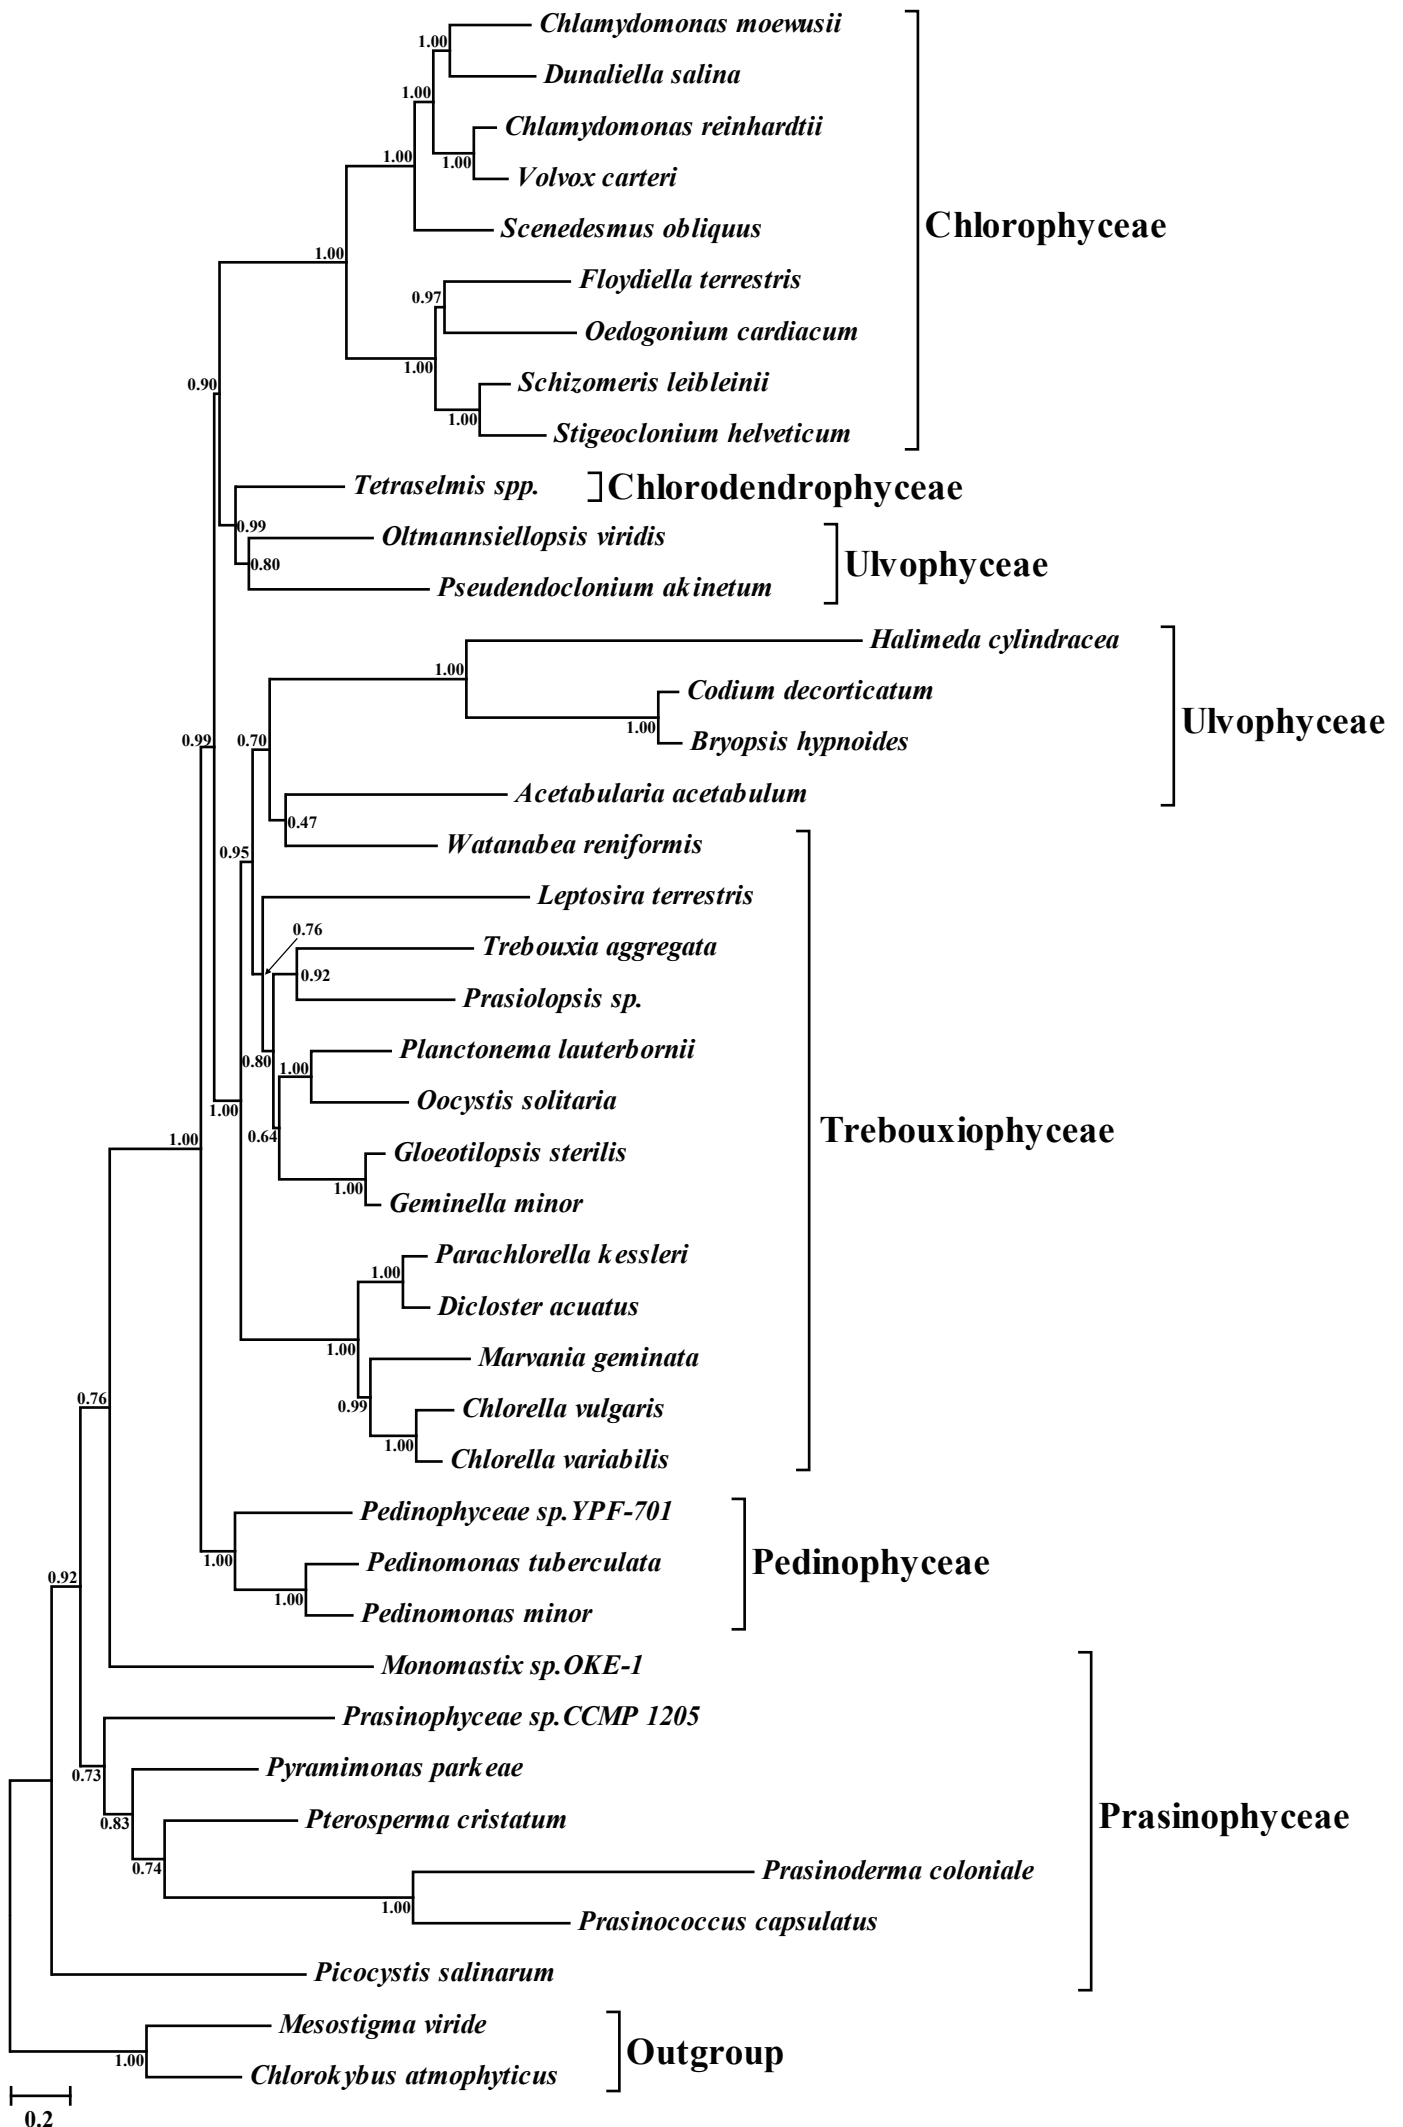

Figure S6. Bayesian phylogenetic tree under the CAT+GTR heterogeneous model based on 26,240 sites with 41 taxa. The posterior probability (PP) values are shown on the nodes.



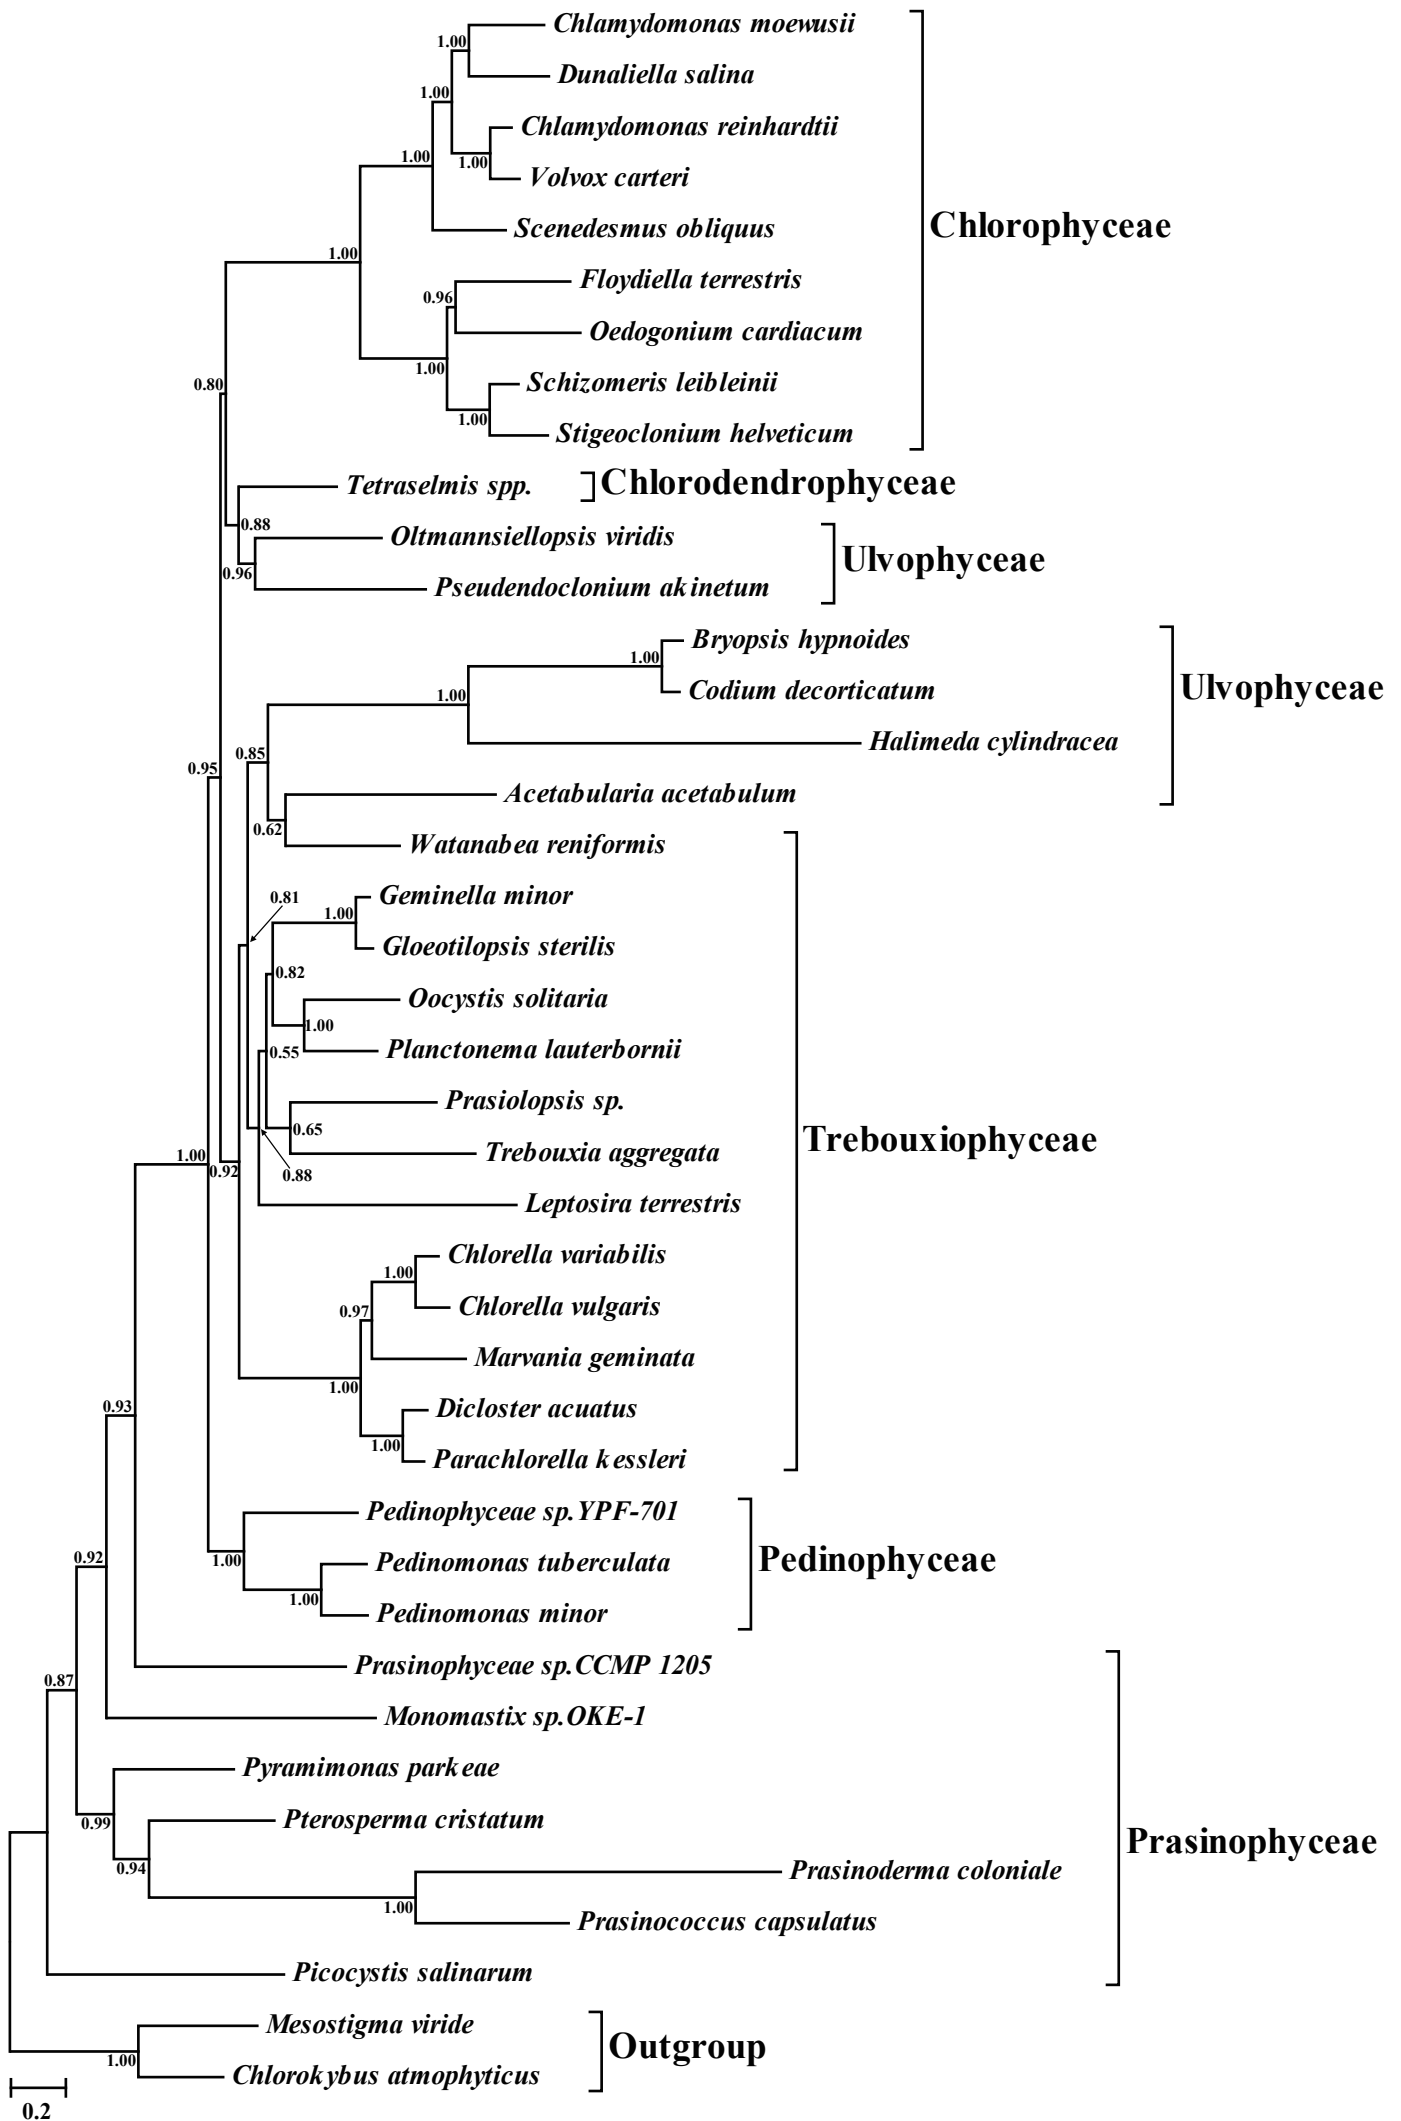

Figure S7. Bayesian phylogenetic tree under the CAT+GTR heterogeneous model based on 25,240 sites with 41 taxa. The posterior probability (PP) values are shown on the nodes.
